# Supplementary material
Source: PubMed Central journal article supplement (PMC6191368)
Supplement: NIHMS979326-supplement-1.pdf [file NIHMS979326-supplement-1.pdf]

**Table S1. Cell lines and culture media**

| Cell Line | Source           | Medium           | TP53 <sup>1</sup> | BRCA1 <sup>2,3</sup> | BRCA2 <sup>2,3</sup> |
|-----------|------------------|------------------|-------------------|----------------------|----------------------|
| A2780     | Dr. Gordon Mills | RPMI-1640        |                   |                      |                      |
| CaOv3     | ATCC             | DMEM             | ns (p.Q136*)      | hetloss              |                      |
| EFO21     | Dr. Gordon Mills | RPMI-1640        | ms (p.C124R)      |                      | hetloss              |
| EFO27     | Dr. Gordon Mills | RPMI-1640        | ms (p.R273C)      |                      |                      |
| HeyA8     | Dr. Gordon Mills | RPMI-1640        |                   |                      |                      |
| IGROV1    | Dr. Gordon Mills | RPMI-1640        | ms (p.Y126C)      | fs and hetloss       | ms                   |
| OAW42     | Dr. Gordon Mills | DMEM             |                   |                      |                      |
| OC316     | UCSF Tumor Bank  | RPMI-1640        | ms (p. R273H)     |                      | fs and hetloss       |
| OVCAR3    | ATCC             | RPMI-1640        | ms (p.R248Q)      | hetloss              | hetloss              |
| OVCAR5    | Dr. Gordon Mills | RPMI-1640        | Ins               |                      |                      |
| SKOv3     | Dr. Gordon Mills | McCoy's 5A       | fs                | hetloss              | hetloss              |
| SW626     | ATCC             | Leibovitz's L-15 | ms (p.G262V)      | hetloss              | hetloss              |
| UPN251    | Dr. Gordon Mills | RPMI-1640        |                   | ins                  |                      |

1. IARC TP53 database
2. Stordal B, et, al. BRCA1/2 mutation analysis in 41 ovarian cell lines reveals only one functionally deleterious BRCA1 mutation. *Mol Oncol.* 2013, 7(3):567-579
3. Domcke S, et, al. Evaluating cell lines as tumour models by comparison of genomic profiles. *Nature Communications.* 2013. DOI: 10.1038/ncomms3126

ns: nonsense

ms: missense

fs: frame shift

hetloss: heterozygous loss

ins: insertion

**Table S2. GE Dharmacon siRNA catalogues**

| <b>siRNA</b> | <b>Catalog</b> |
|--------------|----------------|
| AATK         | MQ-005301      |
| ACRBP        | MQ-013575      |
| BMP2K        | MQ-013575      |
| CHUK         | MQ-003473      |
| EDN2         | LQ-017723      |
| IKBKB        | MQ-003473      |
| ILK          | MQ-004499      |
| RAPGEF3      | MQ-007676      |
| RAPGEF4      | MQ-009511      |
| SIK2         | MQ-004778      |
| STK24        | MQ-004872      |
| STK39        | MQ-004875      |
| TBK1         | LQ-003788      |
| TRIM27       | MQ-006552      |

**Table S3. Primers**

| Gene Symbol          | GenBank Accession No. | Sequence                                                                 |
|----------------------|-----------------------|--------------------------------------------------------------------------|
| GAPDH                | NM_002046.5           | F: TCG ACA GTC AGC CGC ATC TTC TTT<br>R: ACC AAA TCC GTT GAC TCC GAC CTT |
| AATK                 | NM_001080395.2        | F: ACC GTC TAC CTC TTT GAC CAG GAA<br>R: TCT TCC GCT GTG GAG CCA TTT     |
| ACRBP                | NM_032489.2           | F: CTC AAG GAG ATA GAA GCT TC<br>R: TTC CTG CTT GTG TTC TTG TG           |
| BMP2K                | NM_017593.3           | F: GTT TCC CTC CAT AAA GGT TG<br>R: TTC TGT GAT ACC TGT GAA GC           |
| CHUK                 | NM_001278.4           | F: CTG TAG CTC CAT GAT TTC AG<br>R: AAG AAC ACT TTG ATC TCA GC           |
| EDN2                 | NM_001302269.1        | F: CCA AAG GCT GAG GGA CAT T<br>R: ACG ACA CTA TCT CTT CCT CCA           |
| IKBKB                | NM_001190720.2        | F: CAG ATT GCC ATC AAG CAG TG<br>R: CAA GTT CTG CAT CCC CTC AG           |
| ILK <sup>1</sup>     | NM_001014795.2        | F: GAC GAC ATT TTC ACT CAG TGC C<br>R: ACG GTT CAT TAC ATT GAT CCG TG    |
| RAPGEF3              | NM_001098531.2        | F: CTC TGG TGA ATG ATG CAC CC<br>R: ACA GAA GCT CTA GGA TCT TC           |
| RAPGEF4 <sup>2</sup> | NM_001100397.1        | F: CAC CTC TCA TTG AAC CTC ACG<br>R: GTC CGG GAG TGA ACA CAT GG          |
| SIK2                 | NM_015191.2           | F: CAG CAG CTG CAG GAA CAT AG<br>R: GAC TTG GCT GTG GGT AGG AG           |
| STK24                | NM_001032296.3        | F: CTG AGT CAG TGT GAC AGT CC<br>R: AGC TTC ACC TCG CCA TGC TC           |
| STK39                | NM_013233.2           | F: ACA GAA ACG GTC AGA TTC AC<br>R: TCC AAA ACT CCA CAT GTC AG           |
| TBK1                 | NM_013254.3           | F: ATA TCA TGC GTG TTA TAG GG<br>R: GGT CTA AAT GGC AGT GAT CC           |
| TRIM27               | NM_006510.4           | F: AGC AAA TCC AGA ACC AGC TC<br>R: GGG TGA TGG CAC CAT TGA TG           |

<sup>1</sup>. PrimerBank ID: 62420874c1

<sup>2</sup>. PrimerBank ID: 155030205c1

**Table S4. siRNA transfection conditions for custom screens**

|              | <b>Transfection Reagent</b> | <b>Negative siRNA Control</b>          | <b>Positive siRNA Control</b> | <b>Paclitaxel (nM)</b> |
|--------------|-----------------------------|----------------------------------------|-------------------------------|------------------------|
| <b>A2780</b> | DharmaFECT 3                | ON-TARGETplus Non-Targeting Control #4 | siCOPB2                       | 1.9                    |
| <b>CaOv3</b> | DharmaFECT 1                | ON-TARGETplus Non-Targeting Control #3 | siPLK1                        | 0.4                    |
| <b>EFO27</b> | DharmaFECT 1                | ON-TARGETplus Non-Targeting Control #4 | siPLK1                        | 37.3                   |
| <b>HeyA8</b> | DharmaFECT 1                | ON-TARGETplus Non-Targeting Control #4 | siPLK1                        | 8.3                    |
| <b>OAW42</b> | DharmaFECT 1                | ON-TARGETplus Non-Targeting Control #3 | siPLK1                        | 2.8                    |
| <b>SKOv3</b> | Lipofectamine RNAiMax       | ON-TARGETplus Non-Targeting Control #4 | siPLK1                        | 4.0                    |

**Table S5. Antibodies for Western blot and immunohistochemistry**

| <b>Description</b>    | <b>Vendor</b>             | <b>Catalog</b> |
|-----------------------|---------------------------|----------------|
| Actin                 | Sigma                     | MAB1501        |
| Detyrosinated tubulin | Abcam                     | Ab3201         |
| $\alpha$ -Tubulin     | Cell Signaling Technology | 3873           |
| GAPDH                 | Millipore                 | MAB374         |
| phospho MAP4          | Thermo Fisher             | PA5-64526      |
| MAP4                  | Santa Cruz Biotechnology  | sc-135980      |
| IKBKB                 | Cell Signaling Technology | 8943           |
| p38                   | Cell Signaling Technology | 8690           |
| phospho p38           | Cell Signaling Technology | 4511           |
| STK39                 | Abcam                     | Ab128894       |
| TBK1                  | Cell Signaling Technology | 3013           |

**Table S6. Paclitaxel sensitivity in 12 ovarian cancer cell lines.**

| siRNA     | A2780        | CaOV3        | EFO21        | EFO27        | HEY          | IGROV1       | OAW42        | OC316        | OVCAR3       | SKOV3        | SW626        | UPN251       | <i>p</i> | >1.25 | >1.5 | >2   | siRNA     |
|-----------|--------------|--------------|--------------|--------------|--------------|--------------|--------------|--------------|--------------|--------------|--------------|--------------|----------|-------|------|------|-----------|
|           |              |              |              |              |              |              |              |              |              |              |              |              | <0.05    | fold  | fold | fold |           |
| siAATK    | -1.09        | 1.23         | 1.11         | -1.03        | <b>-1.09</b> | -1.1         | 1.03         | -1.04        | -1.1         | -1.01        | <b>-1.37</b> | -1.41        | 2        | 1     | 0    | 0    | siAATK    |
| siACRBP   | <b>-3.33</b> | 1.07         | <b>-1.27</b> | -1.11        | <b>-2.63</b> | <b>-1.47</b> | -1.16        | <b>-2.08</b> | <b>-1.79</b> | <b>-3.33</b> | -1.15        | <b>-4.00</b> | 8        | 8     | 6    | 5    | siACRBP   |
| siBMP2K   | -1.06        | 1.02         | 1.09         | 1.16         | -1.14        | <b>-1.3</b>  | -1.05        | <b>-1.14</b> | <b>-2.04</b> | 1.06         | -1.96        | -1.52        | 3        | 4     | 3    | 1    | siBMP2K   |
| siCHUK    | <b>-1.79</b> | -1.06        | <b>-1.75</b> | <b>-1.23</b> | <b>-1.56</b> | <b>-1.69</b> | <b>-1.33</b> | <b>-2.5</b>  | <b>-1.72</b> | <b>-2.27</b> | -1.41        | <b>-2.04</b> | 10       | 10    | 8    | 3    | siCHUK    |
| siEDN2    | <b>-1.65</b> | -1.08        | <b>-1.14</b> | 1.16         | <b>-2.89</b> | <b>-1.45</b> | 1.05         | -1.05        | <b>-1.23</b> | <b>-1.7</b>  | -1.18        | <b>-1.43</b> | 7        | 5     | 3    | 1    | siEDN2    |
| siIKBKB   | <b>-1.64</b> | 1.09         | <b>-1.61</b> | -1.11        | <b>-1.89</b> | <b>-1.64</b> | <b>-1.54</b> | <b>-1.45</b> | <b>-2.13</b> | <b>-2.17</b> | 1.06         | -2.86        | 8        | 9     | 8    | 3    | siIKBKB   |
| siILK     | <b>1.23</b>  | -1.05        | <b>-1.37</b> | <b>-1.39</b> | -1.1         | <b>-1.19</b> | -1.11        | -1.06        | -1.11        | -1.14        | 1.06         | <b>-1.2</b>  | 5        | 2     | 0    | 0    | siILK     |
| siRAPGEF3 | <b>-1.56</b> | -1.09        | <b>-1.69</b> | <b>-1.39</b> | <b>-1.67</b> | <b>-1.52</b> | <b>-1.27</b> | -1.19        | <b>-3.57</b> | -1.3         | 1.12         | <b>-1.82</b> | 8        | 9     | 6    | 1    | siRAPGEF3 |
| siRAPGEF4 | -1.22        | <b>-1.16</b> | <b>-1.92</b> | -1.52        | <b>-1.09</b> | -1.12        | -1.03        | <b>-1.3</b>  | <b>-1.41</b> | 1.08         | 1.21         | 1.2          | 5        | 4     | 2    | 0    | siRAPGEF4 |
| siSIK2    | <b>-1.89</b> | <b>-1.33</b> | <b>-1.54</b> | -1.03        | <b>-1.61</b> | <b>-1.85</b> | -1.02        | <b>-6.25</b> | <b>-1.79</b> | <b>-2.63</b> | <b>-1.35</b> | <b>-5.56</b> | 10       | 10    | 8    | 3    | siSIK2    |
| siSTIK24  | 1.06         | 1.05         | <b>-1.64</b> | -1.06        | <b>-1.18</b> | 1.22         | <b>-1.23</b> | <b>-1.39</b> | -1.11        | -1.2         | -1.16        | -1.19        | 4        | 2     | 1    | 0    | siSTIK24  |
| siSTK39   | <b>-1.37</b> | <b>-1.25</b> | <b>-1.64</b> | <b>-2.44</b> | <b>-2.63</b> | <b>-1.61</b> | <b>-1.16</b> | <b>-2.13</b> | <b>-1.82</b> | <b>-2.08</b> | <b>-1.37</b> | <b>-1.79</b> | 12       | 11    | 8    | 4    | siSTK39   |
| siTBK1    | <b>-1.77</b> | -1.01        | <b>-1.69</b> | <b>-1.56</b> | <b>-1.66</b> | -1.13        | 1.04         | 1.01         | <b>-1.43</b> | <b>-2.13</b> | -1.25        | -1.18        | 6        | 7     | 5    | 1    | siTBK1    |
| siTRIM27  | <b>-3.13</b> | -1.03        | -1.1         | -1.56        | <b>-1.25</b> | -1.00        | -1.05        | <b>-1.67</b> | <b>-2.56</b> | <b>-1.75</b> | -1.27        | <b>-1.79</b> | 6        | 7     | 6    | 2    | siTRIM27  |

Normalized to siControl in each cell line

Sensitization (<-1) : - siControl IC<sub>50</sub> / siRNA IC<sub>50</sub>, *P*<0.05 Bold

Desensitization (>1) : siRNA IC<sub>50</sub>/ siControl IC<sub>50</sub>, *P*<0.05 Bold

**Table S7. Paclitaxel sensitivity of two siRNA combination in six ovarian cancer cell lines.**

|               | Fold Change |       |       |       |       |         | <i>p</i><br><0.05 | >1.25<br>fold | >1.5<br>fold | >2<br>fold |
|---------------|-------------|-------|-------|-------|-------|---------|-------------------|---------------|--------------|------------|
|               | A2780       | CaOv3 | EFO27 | HeyA8 | OAW42 | SKOv3ip |                   |               |              |            |
| AATK-CHUK     | 2.45        | 1.01  | -1.12 | -1.29 | -1.28 | -1.47   | 2                 | 3             | 0            | 0          |
| CHUK-AATK     | 2.70        | 1.62  | -1.28 | 1.04  | -1.37 | -1.88   | 2                 | 3             | 1            | 0          |
| AATK-IKBKB    | 2.92        | -1.25 | -1.39 | -1.31 | -1.41 | -1.07   | 4                 | 4             | 0            | 0          |
| IKBKB-AATK    | 3.07        | -1.09 | -1.21 | -1.68 | 1.03  | 1.03    | 1                 | 1             | 1            | 0          |
| ACRBP-CHUK    | 2.02        | 1.04  | 1.41  | -1.04 | 1.44  | -1.29   | 1                 | 2             | 0            | 0          |
| CHUK-ACRBP    | 1.54        | 1.13  | 1.67  | -1.06 | 1.02  | -1.33   | 1                 | 1             | 0            | 0          |
| ACRBP-IKBKB   | 2.41        | -1.06 | 1.05  | -1.11 | -1.24 | -1.16   | 2                 | 0             | 0            | 0          |
| IKBKB-ACRBP   | 1.25        | -1.05 | 1.35  | -1.43 | -1.07 | 1.08    | 1                 | 1             | 0            | 0          |
| ACRBP-ILK     | 1.46        | -1.28 | 1.57  | 1.01  | -1.26 | -1.07   | 1                 | 2             | 0            | 0          |
| ILK-ACRBP     | 1.36        | -1.05 | 1.82  | -1.35 | -1.72 | -1.10   | 3                 | 2             | 1            | 0          |
| ACRBP-STK39   | 1.91        | -1.04 | 1.08  | 1.20  | -1.38 | -1.26   | 2                 | 2             | 0            | 0          |
| STK39-ACRBP   | 3.16        | -1.14 | 1.17  | -1.00 | -1.20 | -1.41   | 2                 | 1             | 0            | 0          |
| BMP2K-CHUK    | 1.72        | 1.27  | 1.15  | -1.40 | -1.05 | -1.02   | 1                 | 1             | 0            | 0          |
| CHUK-BMP2K    | 1.68        | 1.24  | 1.20  | 1.05  | 1.09  | -1.65   | 1                 | 1             | 0            | 0          |
| CHUK-EDN2     | 1.07        | 1.11  | -1.01 | -1.77 | 1.03  | -1.73   | 2                 | 2             | 2            | 0          |
| EDN2-CHUK     | 1.11        | 1.02  | -1.18 | -1.92 | -1.09 | -2.18   | 2                 | 2             | 2            | 1          |
| CHUK-IKBKB    | -1.04       | 1.39  | -1.22 | -2.44 | 1.11  | -1.31   | 2                 | 2             | 1            | 1          |
| IKBKB-CHUK    | -1.21       | -1.09 | -1.25 | -2.25 | -1.42 | 1.05    | 3                 | 3             | 1            | 1          |
| EDN2-ACRBP    | -1.05       | 1.18  | 1.40  | -1.32 | -1.12 | -1.34   | 2                 | 2             | 0            | 0          |
| ACRBP-CHUK    | -1.39       | -1.17 | 1.73  | 1.21  | -1.23 | -1.05   | 2                 | 1             | 0            | 0          |
| EDN2-ILK      | -1.14       | 1.15  | -1.44 | -2.36 | -1.17 | -1.76   | 3                 | 3             | 2            | 1          |
| ILK-EDN2      | -1.15       | 1.02  | 1.48  | -1.37 | -1.63 | -1.12   | 3                 | 2             | 1            | 0          |
| EDN2-TBK1     | 1.02        | -1.01 | -1.39 | -2.21 | -1.54 | -2.27   | 4                 | 4             | 3            | 2          |
| TBK1-EDN2     | -1.05       | 1.04  | 1.02  | -1.71 | -1.22 | -1.81   | 3                 | 2             | 2            | 0          |
| IKBKB-ILK     | -1.35       | -1.62 | -1.40 | -2.62 | -2.51 | -1.05   | 5                 | 5             | 3            | 2          |
| ILK-IKBKB     | -1.21       | -1.17 | -1.26 | -1.80 | -1.42 | -1.34   | 4                 | 4             | 1            | 0          |
| IKBKB-TRIM27  | -1.49       | -1.38 | -1.26 | -3.25 | -2.12 | 1.12    | 4                 | 5             | 2            | 2          |
| TRIM27-IKBKB  | -1.13       | 1.05  | -1.13 | -1.68 | -1.08 | 1.13    | 1                 | 1             | 1            | 0          |
| IKBKB-STK39   | -1.26       | -1.12 | -1.65 | -2.91 | -2.02 | -1.18   | 6                 | 4             | 3            | 2          |
| STK39-IKBKB   | -1.73       | 1.14  | -2.61 | -1.20 | -2.17 | -1.78   | 5                 | 4             | 4            | 2          |
| IKBKB-TBK1    | -1.22       | 1.00  | -1.35 | -2.89 | -1.53 | 1.11    | 4                 | 3             | 2            | 1          |
| TBK1-IKBKB    | -1.18       | -1.11 | -1.27 | -2.11 | -1.48 | -1.39   | 4                 | 4             | 1            | 1          |
| ILK-STK39     | -1.24       | -1.09 | 1.12  | -1.29 | -1.68 | -1.12   | 3                 | 2             | 1            | 0          |
| STK39-ILK     | -1.12       | -1.22 | -1.01 | -1.43 | -1.81 | -1.06   | 3                 | 2             | 1            | 0          |
| RAPGEF3-CHUK  | -1.38       | -1.05 | 1.35  | -1.09 | -1.27 | -1.06   | 3                 | 2             | 0            | 0          |
| CHUK-RAPGEF3  | -1.17       | 1.28  | 1.23  | -1.29 | -1.21 | -1.08   | 3                 | 1             | 0            | 0          |
| RAPGEF4-CHUK  | -1.15       | -1.02 | 1.05  | -1.58 | 1.01  | -1.12   | 2                 | 1             | 1            | 0          |
| CHUK-RAPGEF4  | -1.17       | -1.45 | 1.08  | -1.83 | -1.03 | -1.38   | 3                 | 3             | 1            | 0          |
| RAPGEF4-IKBKB | -1.17       | 1.10  | -1.18 | -2.05 | 1.03  | 1.15    | 2                 | 1             | 1            | 1          |

|                 |              |              |             |              |              |              |   |   |   |   |
|-----------------|--------------|--------------|-------------|--------------|--------------|--------------|---|---|---|---|
| IKBKB-RAPGEF4   | -1.20        | -1.05        | -1.09       | <b>-2.10</b> | <b>-1.27</b> | <b>1.20</b>  | 2 | 2 | 1 | 1 |
| RAPGEF4-ILK     | -1.06        | 1.03         | -1.04       | <b>-1.45</b> | <b>1.15</b>  | -1.02        | 1 | 1 | 0 | 0 |
| ILK-RAPGEF4     | <b>-1.33</b> | -1.15        | <b>1.55</b> | <b>-1.20</b> | <b>-1.20</b> | -1.04        | 3 | 1 | 0 | 0 |
| RAPGEF4-RAPGEF3 | 1.07         | 1.13         | 1.06        | <b>-1.29</b> | <b>1.77</b>  | 1.02         | 1 | 1 | 0 | 0 |
| RAPGEF3-RAPGEF4 | <b>-1.23</b> | -1.01        | <b>1.56</b> | <b>-1.27</b> | <b>1.46</b>  | <b>1.11</b>  | 2 | 1 | 0 | 0 |
| TRIM27-SIK2     | -1.14        | <b>1.16</b>  | 1.11        | <b>-1.30</b> | <b>1.29</b>  | <b>-1.28</b> | 2 | 2 | 0 | 0 |
| SIK2-TRIM27     | <b>-1.29</b> | -1.14        | <b>1.51</b> | 1.07         | -1.06        | <b>1.16</b>  | 1 | 1 | 0 | 0 |
| TRIM27-STK39    | -1.13        | <b>1.28</b>  | -1.02       | <b>-1.21</b> | -1.01        | <b>-1.15</b> | 2 | 0 | 0 | 0 |
| STK39-TRIM27    | <b>-1.61</b> | -1.00        | -1.19       | 1.12         | -1.06        | <b>-1.39</b> | 2 | 2 | 1 | 0 |
| STK24-SIK2      | <b>-1.60</b> | -1.00        | <b>1.26</b> | -1.01        | 1.09         | <b>1.24</b>  | 1 | 1 | 1 | 0 |
| SIK2-STK24      | <b>-1.33</b> | <b>-1.20</b> | <b>1.55</b> | -1.01        | -1.19        | <b>1.53</b>  | 2 | 1 | 0 | 0 |
| STK24-TBK1      | <b>-1.45</b> | -1.00        | -1.09       | 1.03         | <b>1.31</b>  | <b>-1.27</b> | 2 | 2 | 0 | 0 |
| TBK1-STK24      | <b>-1.36</b> | -1.02        | 1.16        | <b>-1.40</b> | -1.06        | <b>-1.17</b> | 3 | 2 | 0 | 0 |
| TBK1-STK39      | <b>1.11</b>  | 1.07         | 1.03        | <b>-1.36</b> | <b>-1.55</b> | <b>-1.58</b> | 3 | 3 | 2 | 0 |
| STK39-TBK1      | <b>1.11</b>  | -1.08        | <b>1.22</b> | <b>-1.06</b> | <b>-1.48</b> | <b>-1.44</b> | 3 | 2 | 0 | 0 |
| TBK1-ILK        | -1.16        | 1.00         | 1.12        | <b>-1.37</b> | <b>-1.46</b> | <b>-2.34</b> | 3 | 3 | 1 | 1 |
| ILK-TBK1        | <b>-1.23</b> | -1.05        | <b>1.50</b> | <b>-1.36</b> | -1.11        | <b>-1.52</b> | 3 | 2 | 1 | 0 |
| TBK1-RAPGEF3    | -1.11        | 1.07         | <b>1.31</b> | <b>-1.47</b> | <b>-1.45</b> | <b>-1.35</b> | 3 | 3 | 0 | 0 |
| RAPGEF3-TBK1    | <b>-1.32</b> | -1.19        | <b>1.90</b> | <b>-1.22</b> | 1.14         | <b>-1.35</b> | 3 | 2 | 0 | 0 |

Normalized to siControl in each cell line

Sensitization (<-1) : - siControl / siRNA, *P*<0.05 Bold

Desensitization (>1) : siRNA / siControl, *P*<0.05 Bold

**Table S8. TMA patient information**

| Bank ID | Diagnosis                               | Grade      | Stage   |
|---------|-----------------------------------------|------------|---------|
| 403     | Clear Cell Carcinoma                    | High Grade | IV      |
| 2494    | Clear Cell Carcinoma                    | High Grade | IIC     |
| 56      | Clear Cell Carcinoma                    | High Grade | IIIC    |
| 181     | Clear Cell Carcinoma                    | High Grade | IIC     |
| 642     | Clear Cell Carcinoma                    | High Grade | IIIC    |
| 4214    | Clear Cell Carcinoma (recurrent)        | High Grade | Unknown |
| 2179    | Endometrioid Adenocarcinoma             | High Grade |         |
| 502     | Endometrioid Adenocarcinoma             | Low Grade  | IIIC    |
| 604     | Endometrioid Adenocarcinoma             | High Grade | IIIC    |
| 2318    | Endometrioid Adenocarcinoma             | Low Grade  | IC      |
| 3360    | Endometrioid Adenocarcinoma             | High Grade | IIIC    |
| 395     | Endometrioid Adenocarcinoma             | Low Grade  | IIC     |
| 585     | Endometrioid Adenocarcinoma             | High Grade | IV      |
| 2165    | Endometrioid Adenocarcinoma             | Low Grade  | IB      |
| 2295    | Endometrioid Adenocarcinoma             | Low Grade  | IIIC    |
| 2309    | Endometrioid Adenocarcinoma             | High Grade | IIIA    |
| 310     | Endometrioid Adenocarcinoma             | High Grade | IIIC    |
| 386     | Endometrioid Adenocarcinoma             | Low Grade  | IA      |
| 602     | Endometrioid Adenocarcinoma             | High Grade | IIIC    |
| 2339    | Endometrioid Adenocarcinoma (recurrent) | Low Grade  | IV      |
| 1089    | Endometrioid Adenocarcinoma             | Low Grade  | IV      |
| 2303    | Endometrioid Adenocarcinoma             | High Grade | IA      |
| 416     | Malignant Mixed Mullerian Tumor (MMMT)  | High Grade | IV      |
| 740     | Malignant Mixed Mullerian Tumor (MMMT)  | High Grade | IIIC    |
| 913     | Malignant Mixed Mullerian Tumor (MMMT)  | High Grade | IIIC    |
| 3412    | Malignant Mixed Mullerian Tumor (MMMT)  | High Grade | IIIC    |
| 4843    | Malignant Mixed Mullerian Tumor (MMMT)  | High Grade | IIIC    |
| 489     | Malignant Mixed Mullerian Tumor (MMMT)  | High Grade | IIIC    |
| 474     | Malignant Mixed Mullerian Tumor (MMMT)  | High Grade | IIIC    |
| 76      | Malignant Mixed Mullerian Tumor (MMMT)  | High Grade | IIIC    |
| 3341    | Mixed Type Carcinoma                    | High Grade | Unknown |
| 4380    | Mixed Type Carcinoma                    | High Grade | IIIC    |
| 4387    | Mixed Type Carcinoma                    | High Grade | IIIC    |
| 4530    | Mixed Type Carcinoma                    | High Grade | IIIC    |
| 4711    | Mixed Type Carcinoma                    | High Grade | IIIC    |
| 419     | Mixed Type Carcinoma                    | High Grade | IIIC    |
| 622     | Mixed Type Carcinoma                    | High Grade | IIC     |
| 679     | Mixed Type Carcinoma                    | High Grade | IIIC    |
| 847     | Mixed Type Carcinoma                    | High Grade | IIIC    |
| 871     | Mixed Type Carcinoma                    | High Grade | IIIC    |



---

|      |                         |            |         |
|------|-------------------------|------------|---------|
| 2399 | Mixed Type Carcinoma    | High Grade | IV      |
| 3361 | Mixed Type Carcinoma    | High Grade | IIIC    |
| 4261 | Mixed Type Carcinoma    | High Grade | IIIC    |
| 4628 | Mixed Type Carcinoma    | High Grade | IIIC    |
| 4933 | Mixed Type Carcinoma    | High Grade | IIIC    |
| 259  | Mixed Type Carcinoma    | High Grade | IIIC    |
| 286  | Mixed Type Carcinoma    | High Grade | IIIC    |
| 454  | Mixed Type Carcinoma    | High Grade | IIIC    |
| 470  | Mixed Type Carcinoma    | High Grade | IIIC    |
| 636  | Mixed Type Carcinoma    | High Grade | IB      |
| 890  | Mixed Type Carcinoma    | High Grade | IIIC    |
| 2169 | Mixed Type Carcinoma    | High Grade | IIIC    |
| 4145 | Mixed Type Carcinoma    | High Grade | IIIC    |
| 4717 | Mixed Type Carcinoma    | High Grade | IV      |
| 131  | Mixed Type Carcinoma    | High Grade | IIIC    |
| 524  | Mixed Type Carcinoma    | High Grade | IIIC    |
| 525  | Mixed Type Carcinoma    | High Grade | IIIC    |
| 625  | Mixed Type Carcinoma    | High Grade | IV      |
| 648  | Mixed Type Carcinoma    | High Grade | IIIC    |
| 2338 | Mixed Type Carcinoma    | High Grade | IIIC    |
| 4626 | Mixed Type Carcinoma    | High Grade | IIIC    |
| 4715 | Mixed Type Carcinoma    | High Grade | IIIC    |
| 4151 | Mucinous Adenocarcinoma | High Grade | IIIC    |
| 2345 | Mucinous Adenocarcinoma | Low Grade  | IA      |
| 2547 | Serous Carcinoma        | High Grade | IIIC    |
| 3337 | Serous Carcinoma        | Low Grade  | IIIC    |
| 119  | Serous Carcinoma        | High Grade | IIIC    |
| 2408 | Serous Carcinoma        | Low Grade  |         |
| 8    | Serous Carcinoma        | High Grade | IIIC    |
| 88   | Serous Carcinoma        | High Grade | IIIC    |
| 385  | Serous Carcinoma        | High Grade | IIIC    |
| 482  | Serous Carcinoma        | High Grade | IIIC    |
| 507  | Serous Carcinoma        | High Grade | IIIC    |
| 603  | Serous Carcinoma        | High Grade | IIIC    |
| 659  | Serous Carcinoma        | High Grade | IIIC    |
| 757  | Serous Carcinoma        | High Grade | IIIC    |
| 799  | Serous Carcinoma        | High Grade | IIIC    |
| 861  | Serous Carcinoma        | High Grade | IIIC    |
| 906  | Serous Carcinoma        | High Grade | IIIC    |
| 2440 | Serous Carcinoma        | High Grade | IIIC    |
| 3514 | Serous Carcinoma        | High Grade | IIIC    |
| 4244 | Serous Carcinoma        | High Grade | IV      |
| 4289 | Serous Carcinoma        | High Grade | Unknown |

---

---

|      |                  |            |         |
|------|------------------|------------|---------|
| 4323 | Serous Carcinoma | High Grade | IV      |
| 4567 | Serous Carcinoma | High Grade | IIIC    |
| 4595 | Serous Carcinoma | High Grade | Unknown |
| 59   | Serous Carcinoma | High Grade | IIIC    |
| 80   | Serous Carcinoma | High Grade | IIIC    |
| 242  | Serous Carcinoma | High Grade | IV      |
| 460  | Serous Carcinoma | High Grade | IIIC    |
| 493  | Serous Carcinoma | High Grade | IIIC    |
| 496  | Serous Carcinoma | High Grade | IIIC    |
| 508  | Serous Carcinoma | High Grade | IIIC    |
| 541  | Serous Carcinoma | High Grade | IV      |
| 588  | Serous Carcinoma | High Grade | IIIC    |
| 657  | Serous Carcinoma | High Grade | IIIC    |
| 733  | Serous Carcinoma | High Grade | IV      |
| 763  | Serous Carcinoma | High Grade | IIIC    |
| 783  | Serous Carcinoma | High Grade | IIIC    |
| 795  | Serous Carcinoma | High Grade | IIIC    |
| 850  | Serous Carcinoma | High Grade | IIIC    |
| 863  | Serous Carcinoma | High Grade | IV      |
| 921  | Serous Carcinoma | High Grade | IIIC    |
| 1043 | Serous Carcinoma | High Grade | IIIC    |
| 2232 | Serous Carcinoma | High Grade | IIIC    |
| 2419 | Serous Carcinoma | High Grade | IIIC    |
| 2546 | Serous Carcinoma | High Grade | IV      |
| 3356 | Serous Carcinoma | High Grade | IIIC    |
| 3366 | Serous Carcinoma | High Grade | IIIC    |
| 3375 | Serous Carcinoma | High Grade | IV      |
| 3414 | Serous Carcinoma | High Grade | IIIC    |
| 4253 | Serous Carcinoma | High Grade | IIIC    |
| 4259 | Serous Carcinoma | High Grade | IIIC    |
| 4276 | Serous Carcinoma | High Grade | IV      |
| 4282 | Serous Carcinoma | High Grade | IIIC    |
| 4521 | Serous Carcinoma | High Grade | IIIC    |
| 4533 | Serous Carcinoma | High Grade | IIIC    |
| 4544 | Serous Carcinoma | High Grade | IIIC    |
| 4565 | Serous Carcinoma | Low Grade  | IIIC    |
| 4597 | Serous Carcinoma | High Grade | IIC     |
| 4599 | Serous Carcinoma | High Grade | IIIC    |
| 4602 | Serous Carcinoma | High Grade | IIIC    |
| 4610 | Serous Carcinoma | High Grade | IIIB    |
| 4726 | Serous Carcinoma | High Grade | IIIC    |
| 4732 | Serous Carcinoma | High Grade | IIIC    |
| 5    | Serous Carcinoma | High Grade | IV      |

---

---

|      |                  |            |      |
|------|------------------|------------|------|
| 31   | Serous Carcinoma | High Grade | IIIC |
| 53   | Serous Carcinoma | High Grade | IIIC |
| 57   | Serous Carcinoma | High Grade | IIIC |
| 62   | Serous Carcinoma | High Grade | IIIC |
| 71   | Serous Carcinoma | High Grade | IIIC |
| 112  | Serous Carcinoma | High Grade | IIIA |
| 248  | Serous Carcinoma | High Grade | IIIC |
| 315  | Serous Carcinoma | High Grade | IIIC |
| 316  | Serous Carcinoma | High Grade | IC   |
| 322  | Serous Carcinoma | High Grade | IIIC |
| 370  | Serous Carcinoma | High Grade | IV   |
| 440  | Serous Carcinoma | High Grade | IIIC |
| 495  | Serous Carcinoma | High Grade | IIC  |
| 527  | Serous Carcinoma | High Grade | IV   |
| 549  | Serous Carcinoma | High Grade | IIIC |
| 614  | Serous Carcinoma | High Grade | IV   |
| 630  | Serous Carcinoma | High Grade | IIIC |
| 660  | Serous Carcinoma | High Grade | IIIC |
| 663  | Serous Carcinoma | High Grade | IIIC |
| 680  | Serous Carcinoma | High Grade | IIIC |
| 716  | Serous Carcinoma | High Grade | IIIC |
| 761  | Serous Carcinoma | High Grade | IIIC |
| 772  | Serous Carcinoma | High Grade | IIIC |
| 832  | Serous Carcinoma | High Grade | IIIC |
| 928  | Serous Carcinoma | High Grade | IV   |
| 2171 | Serous Carcinoma | High Grade | IIIC |
| 2227 | Serous Carcinoma | High Grade | IV   |
| 2235 | Serous Carcinoma | High Grade | IIIC |
| 2240 | Serous Carcinoma | High Grade | IV   |
| 2539 | Serous Carcinoma | High Grade | IV   |
| 3484 | Serous Carcinoma | High Grade | IIIC |
| 3724 | Serous Carcinoma | High Grade | IIIC |
| 4383 | Serous Carcinoma | High Grade | IIIC |
| 4400 | Serous Carcinoma | High Grade | IIIC |
| 4514 | Serous Carcinoma | Low Grade  | IV   |
| 4516 | Serous Carcinoma | Low Grade  | IIIC |
| 4613 | Serous Carcinoma | High Grade | IIIC |
| 4620 | Serous Carcinoma | High Grade | IIIC |
| 4621 | Serous Carcinoma | High Grade | IIIC |
| 4638 | Serous Carcinoma | High Grade | IIIC |
| 4662 | Serous Carcinoma | High Grade | IV   |
| 4676 | Serous Carcinoma | High Grade | IV   |
| 4716 | Serous Carcinoma | High Grade | IIIC |

---

---

|      |                              |            |      |
|------|------------------------------|------------|------|
| 4728 | Serous Carcinoma             | High Grade | IIIC |
| 4735 | Serous Carcinoma             | High Grade | IIIC |
| 4934 | Serous Carcinoma             | High Grade | IIIC |
| 60   | Serous Carcinoma             | Low Grade  | IIIC |
| 69   | Serous Carcinoma             | High Grade | IIIC |
| 97   | Serous Carcinoma             | High Grade | IIIC |
| 143  | Serous Carcinoma             | High Grade | IIIC |
| 147  | Serous Carcinoma             | High Grade | IIIC |
| 149  | Serous Carcinoma             | High Grade | IIIC |
| 157  | Serous Carcinoma             | High Grade | IIIC |
| 213  | Serous Carcinoma             | High Grade | IIIC |
| 260  | Serous Carcinoma             | High Grade | IIIC |
| 262  | Serous Carcinoma             | High Grade | IIIC |
| 394  | Serous Carcinoma             | High Grade | IV   |
| 488  | Serous Carcinoma             | High Grade | IV   |
| 547  | Serous Carcinoma             | High Grade | IIIC |
| 575  | Serous Carcinoma             | High Grade | IIIC |
| 631  | Serous Carcinoma             | High Grade | IIIC |
| 637  | Serous Carcinoma             | High Grade | IV   |
| 643  | Serous Carcinoma             | High Grade | IIIC |
| 666  | Serous Carcinoma             | High Grade | IIIC |
| 2331 | Serous Carcinoma             | High Grade | IIIC |
| 2398 | Serous Carcinoma             | High Grade | IIIC |
| 2616 | Serous Carcinoma             | Low Grade  | IIIC |
| 3358 | Serous Carcinoma             | High Grade | IV   |
| 3506 | Serous Carcinoma             | High Grade | IIIC |
| 4531 | Serous Carcinoma             | High Grade | IIIC |
| 4624 | Serous Carcinoma             | High Grade | IIIC |
| 4630 | Serous Carcinoma             | High Grade | IIIC |
| 4633 | Serous Carcinoma             | High Grade | IIIC |
| 4791 | Serous Carcinoma             | High Grade | IIIC |
| 4816 | Serous Carcinoma             | High Grade | IIIC |
| 4320 | Serous Carcinoma (recurrent) | High Grade | IIIC |
| 4724 | Serous Carcinoma (recurrent) | Low Grade  | IIIB |
| 270  | Serous Carcinoma (recurrent) | Low Grade  | IIIC |
| 613  | Serous Carcinoma (recurrent) | High Grade | IA   |
| 4727 | Serous Carcinoma (recurrent) | High Grade | IIIC |
| 4729 | Serous Carcinoma (recurrent) | High Grade | IIIC |
| 2348 | Serous Tumor of LMP          |            | IA   |
| 2561 | Serous Tumor of LMP          |            | IIIA |
| 896  | Transitional Cell Carcinoma  | High Grade | IIIC |
| 475  | Transitional Cell Carcinoma  | High Grade | IIIC |
| 214  | Transitional Cell Carcinoma  | High Grade | IC   |

---

---

|      |                                         |            |      |
|------|-----------------------------------------|------------|------|
| 947  | Transitional Cell Carcinoma             | High Grade | IIIC |
| 4290 | Transitional Cell Carcinoma (recurrent) | High Grade | IIIC |
| 2582 | Undifferentiated Carcinoma              | High Grade | IV   |
| 720  | Undifferentiated Carcinoma              | High Grade | IV   |
| 4299 | Undifferentiated Carcinoma              | High Grade | IV   |
| 126  | Undifferentiated Carcinoma              | High Grade | IIIC |
| 518  | Undifferentiated Carcinoma              | High Grade | IIIC |

---

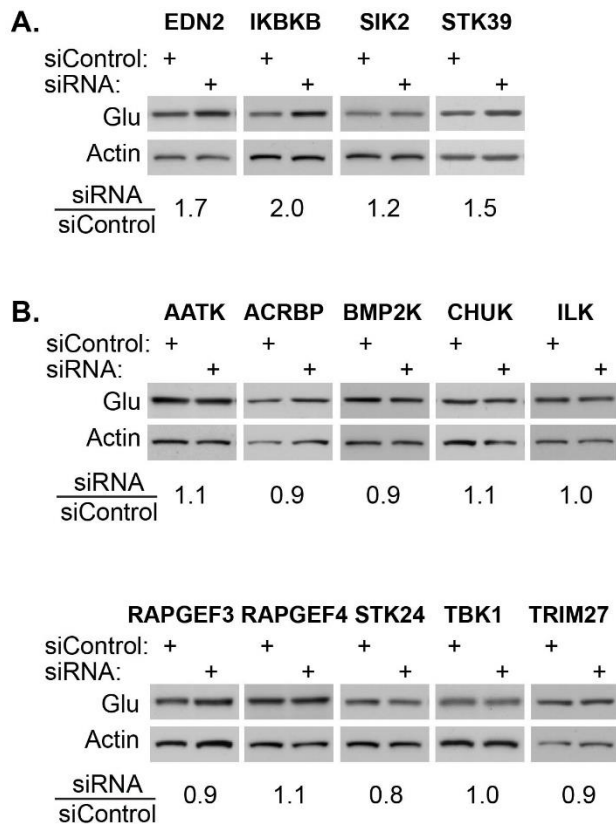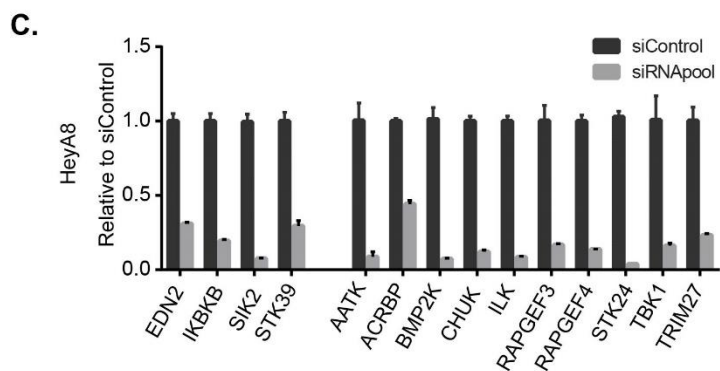

**Figure S1. Effects of single kinase siRNA on microtubule stability.** (A) siEDN2, siIKBKB, siSIK2 and siSTK39 treatment enhanced microtubule stability in the HeyA8 cell line. Cells were reversely transfected with kinase siRNA (siGENOME SMARTpool) for 48 hrs and lysed. Duplicate samples were loaded and immunoblots were performed with specific antibodies as indicated. (B) Treatment of other kinase siRNAs exhibited little or no changes in microtubule stability. Cell treatment is carried out as described above. (C) siRNA knockdown efficiency is presented using quantitation of mRNA. The columns indicate the mean. Data were obtained from two independent experiments.

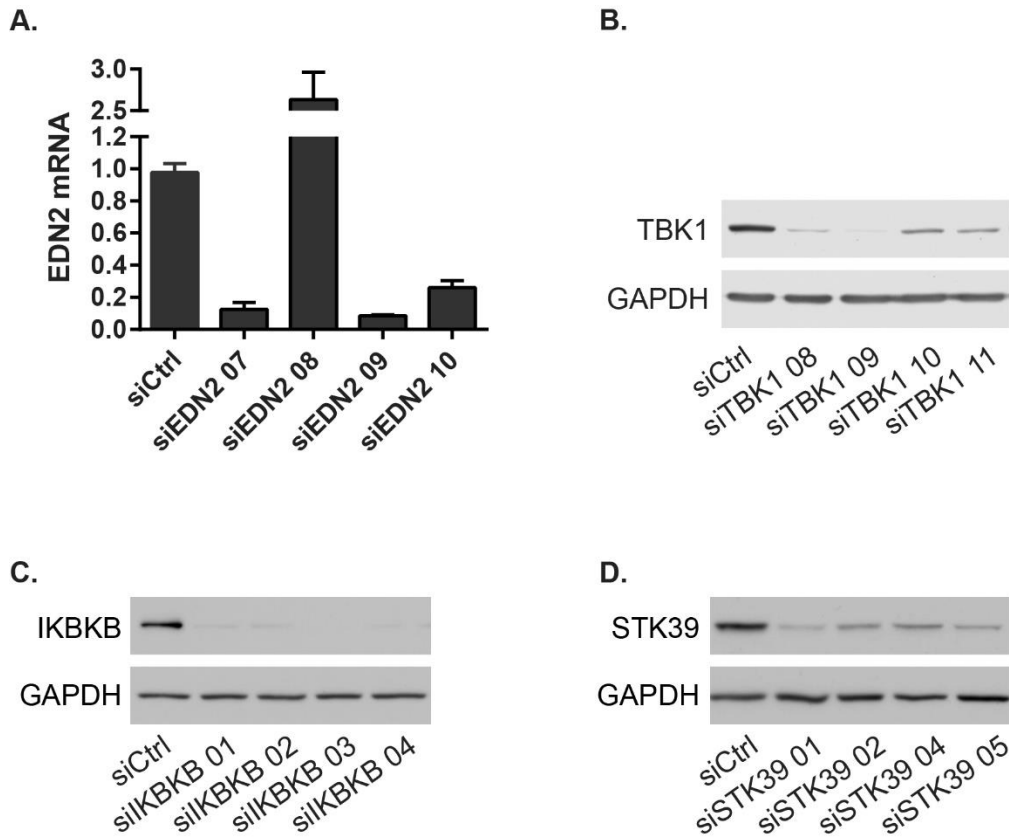

**Figure S2. Knockdown efficiency was examined in SKOV3ip cells.** (A) SKOV3ip cells were transfected with target siRNA and control siRNA for 72 hrs and EDN2 expression was quantified by qPCR due to lack of a good commercial antibody to perform Western blots. (B) TBK1 expression was tested using immunoblots with specific anti-TBK1 antibody. (C) IKBKB expression was tested using immunoblots with specific anti-IKBKB antibody. (D) STK39 expression was tested using immunoblots with specific anti-STK39 antibody.

**A.**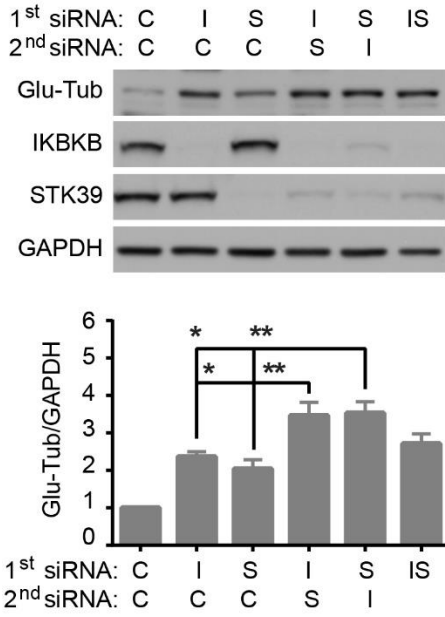**B.**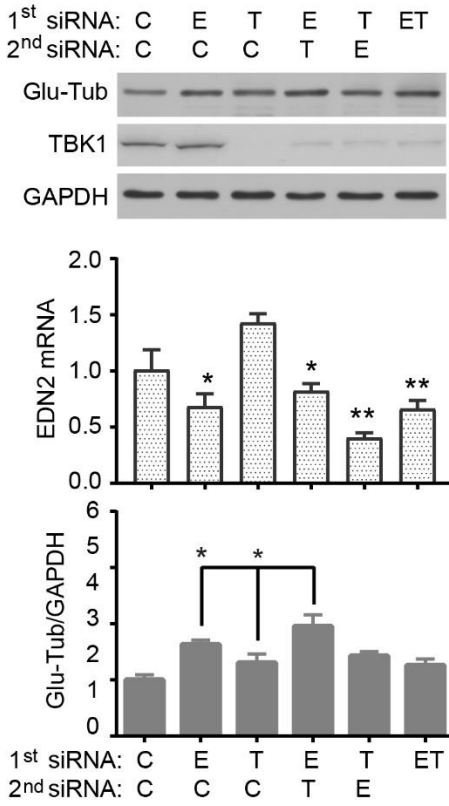**C.**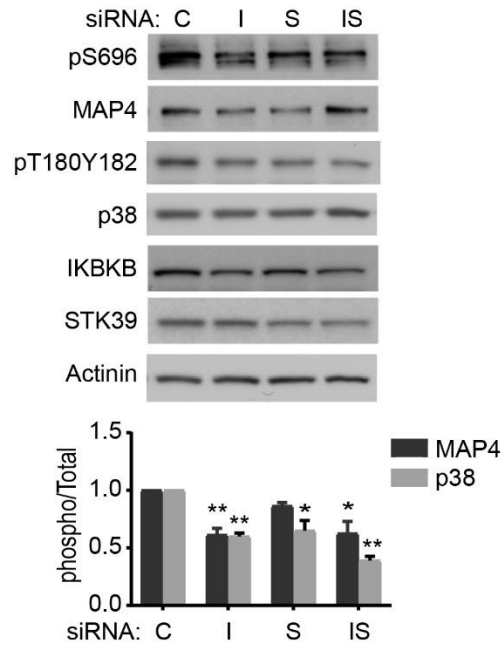**E.**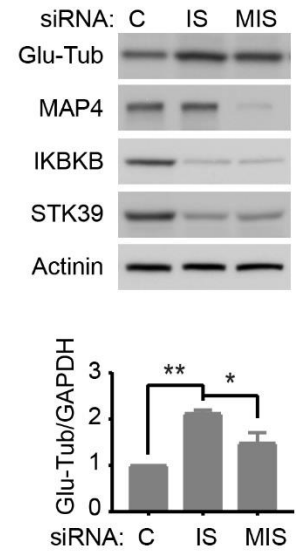**D.**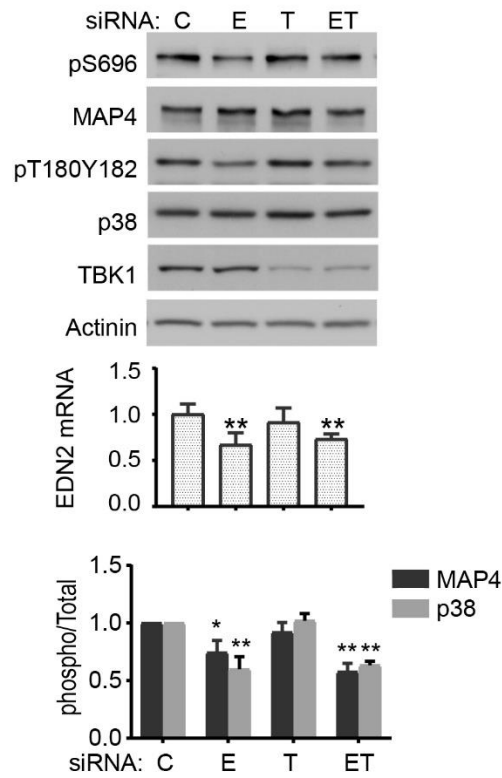**F.**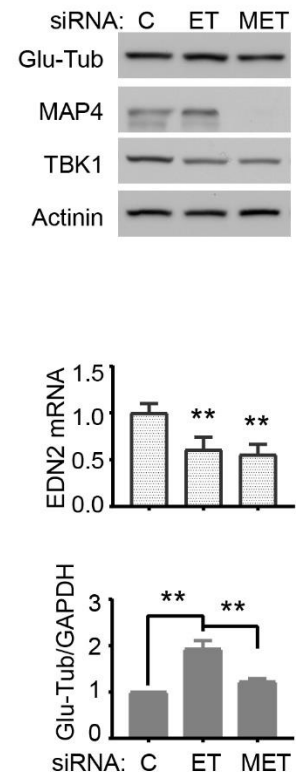



**Figure S3. Sequential treatment of siIKBKB followed by siSTK39 or siEDN2 followed by siTBK1 increases microtubule stability.** (A-B) Microtubule stability was examined in OVCAR5 cells. Cells were treated with siIKBKB / siSTK39 or siSTK39 or siEDN2 sequentially or simultaneously for 72 hrs. Cell lysates were collected and immunoblots were performed with specific antibodies as indicated. (C-D) p38-MAP4 signaling was examined in OVCAR5 cells. Cells were treated with siIKBKB / siSTK39 or siSTK39 or siEDN2 simultaneously for 24 hrs. Cell lysates were collected and immunoblots were performed with specific antibodies as indicated. (E-F) Microtubule stability was examined in OVCAR5 cells. Cells were treated with siMAP4, siIKBKB and siSTK39 or siMAP4, siSTK39 and siEDN2 sequentially for 72 hrs. Immunoblots were carried out as described in (A-B). The columns indicate the mean, and the bars indicate the S.E. (\* $p < 0.05$  and \*\*  $p < 0.01$  compared with control). Data were obtained from three independent experiments. (C: Control; I: IKBKB; S: STK39; M: MAP4; E: EDN2; T: TBK1).

**A.**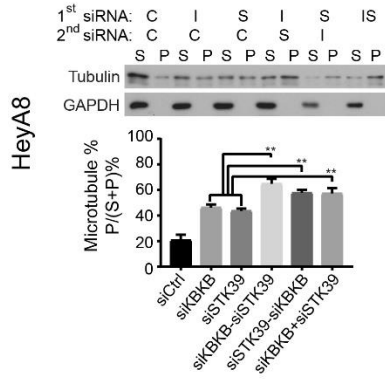**B.**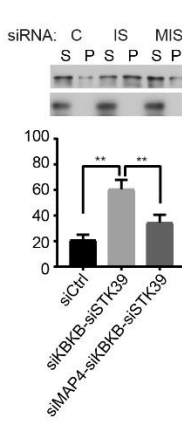**C.**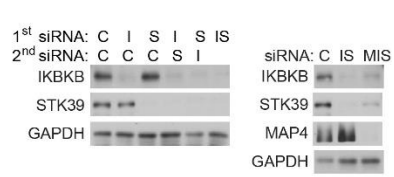**A.**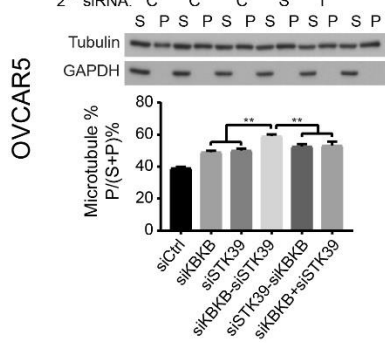**B.**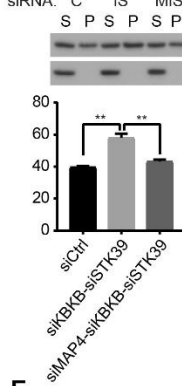**C.**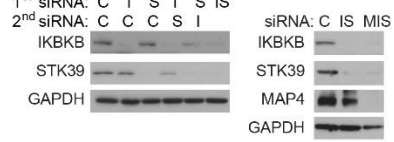**D.**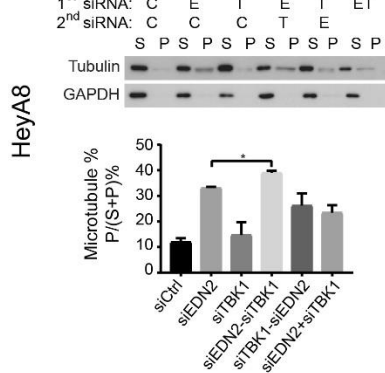**E.**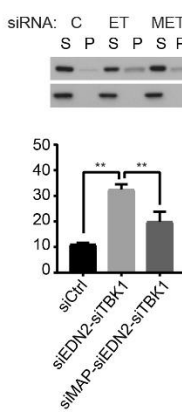**F.**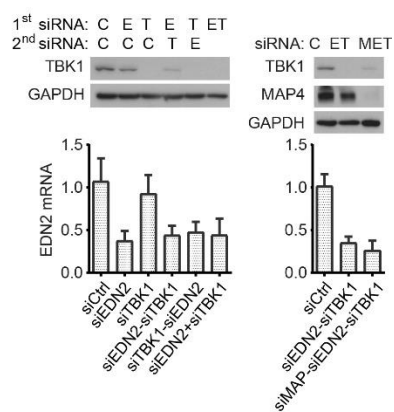**D.**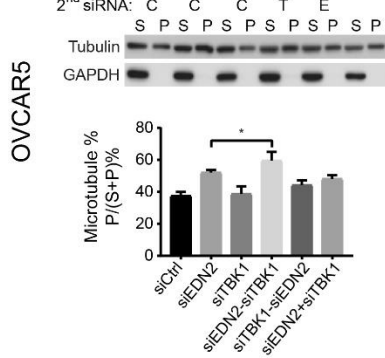**E.**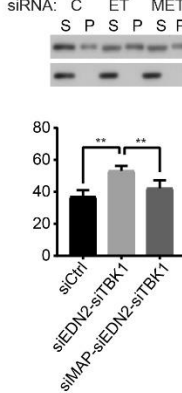**F.**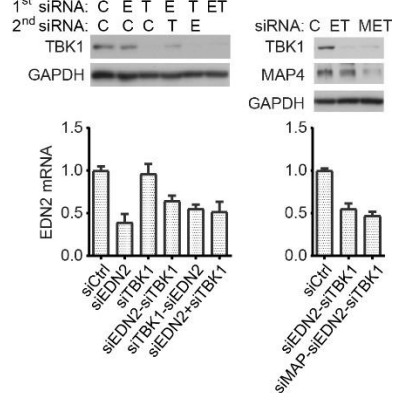

**Figure S4. Sequential treatment of siIKBKB followed by siSTK39 or siEDN2 followed by siTBK1 increases microtubule stability and increasing microtubule stability by depletion of IKBKB/STK39 or EDN2/TBK1 is dependent upon p38-mediated phosphorylation MAP4.** (A-D) The microtubule and free-tubulin fractions was quantified in HeyA8 and OVCAR5 cell lines. Cells were treated with siIKBKB/siSTK39 (A) or siEDN2/siTBK1 (B) sequentially or simultaneously for 72 hrs. Western analysis of tubulin was performed with specific anti-tubulin antibody as indicated. (C-D) Microtubule stability was measured after knockdown of MAP4 in HeyA8 and OVCAR5 cell lines. Cells were treated with siMAP4, siIKBKB and siSTK39 (C) or siMAP4, siEDN2 and siTBK1 (D) sequentially for 72 hrs. Immunoblots were carried out as described in (A). (E-F) siRNA knockdown efficiency was determined by Western blot analysis and RT-PCR. The columns indicate the mean, and the bars indicate the S.D. (\* $p < 0.05$  and \*\* $p < 0.01$  compared with its own control). Data were obtained from three independent experiments. (C: Control; I: IKBKB; S: STK39; M: MAP4; E: EDN2; T: TBK1).

## HeyA8

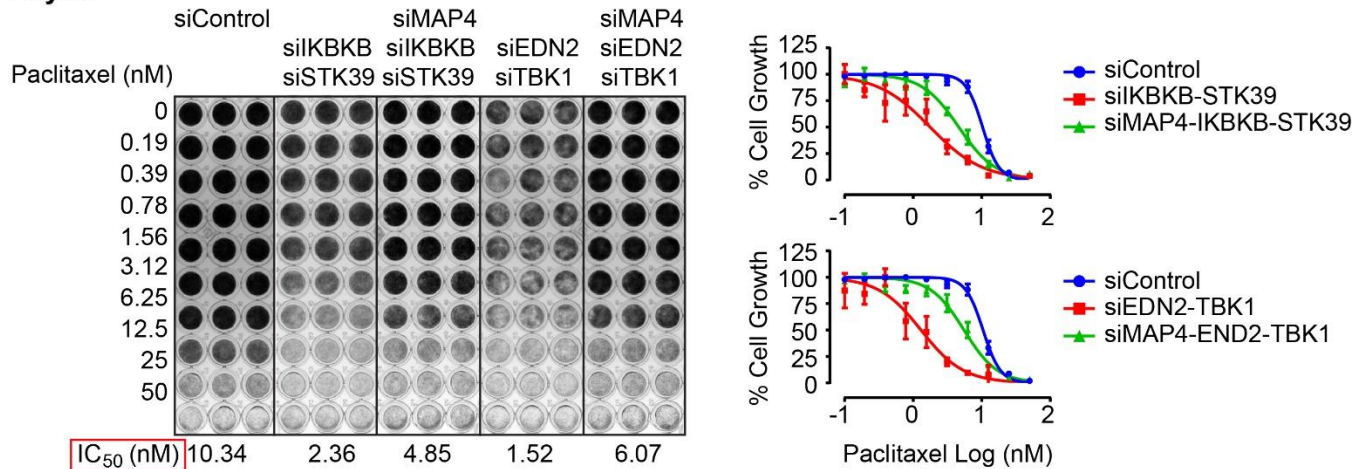

## OVCAR5

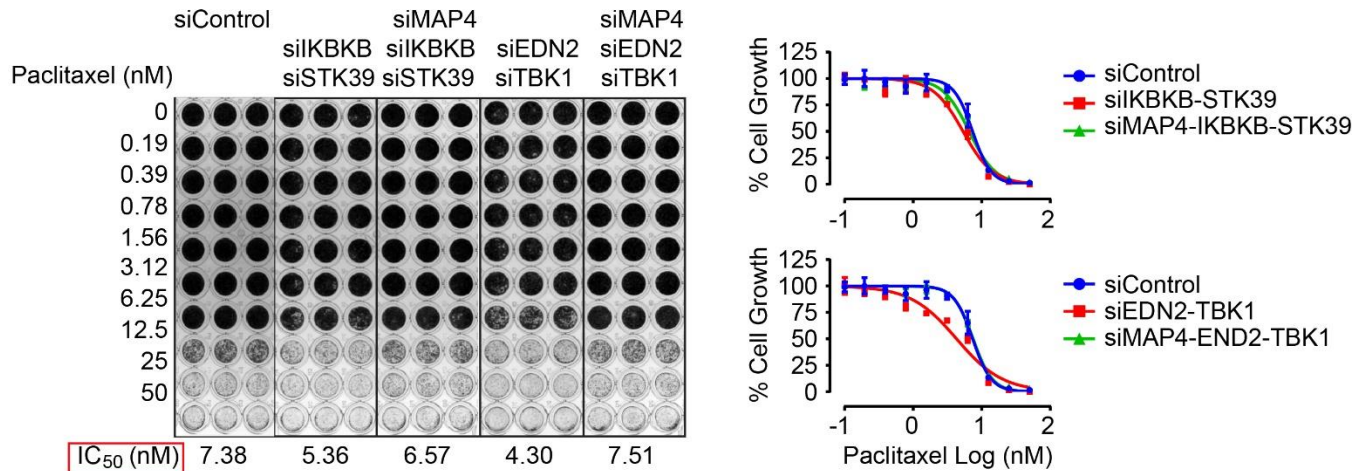

**Figure S5. Increasing paclitaxel sensitivity by depletion of IKBKB and TK39 or EDN2 and TBK1 is dependent upon MAP4.** Paclitaxel IC<sub>50</sub> was examined in HEYA8 and OVCAR5 cells. Cells were treated with siMAP4, siIKBKB and siSTK39 or siMAP4, siSTK39 and siEDN2 by addition of paclitaxel treatment for 72 hrs. Cell growth was examined using an SRB assay. Cell mass was reflected by absorbance at 570 nm and the percentage of paclitaxel induced growth inhibition was calculated for each target siRNA relative to control siRNA. Dose response curves were generated using non-linear regression with the Least Squares fitting method and IC<sub>50</sub> of paclitaxel were calculated using GraphPad Prism 7.

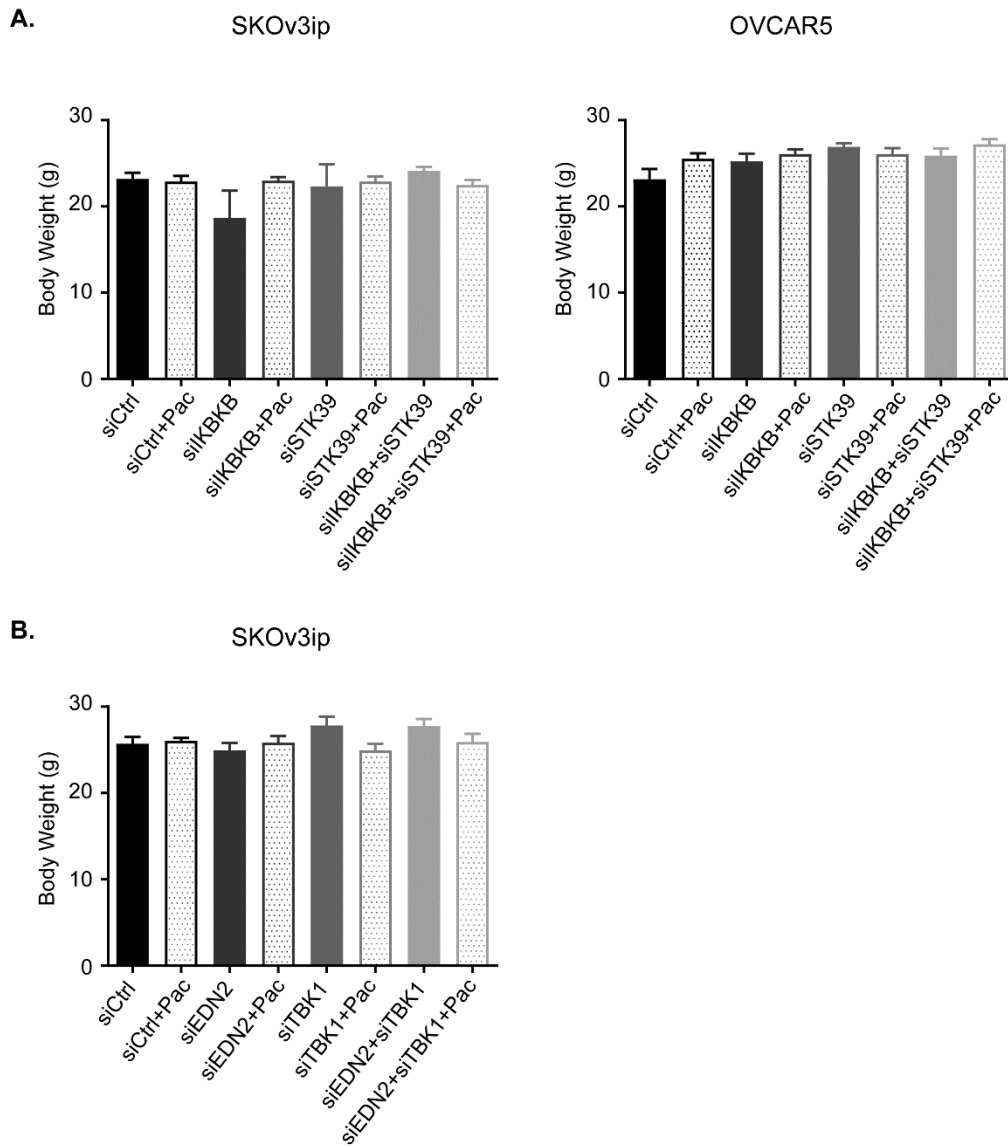

**Figure S6. Mice tolerate the siRNA and paclitaxel treatment.** (A) Mouse body weight under the combination treatment with IKBKB/STK39 and paclitaxel in SKOv3ip and OVCAR5 xenograft models. (B) Mouse body weight during combination treatment with EDN2/TBK1 and paclitaxel in SKOv3ip xenograft model. Athymic nude mice were injected intraperitoneally with  $1.0 \times 10^6$  SKOv3ip cells or OVCAR5 cells and randomly assigned to groups of 10. Mice were treated with paclitaxel and/or DOPC-siRNA 1 week after cell inoculation. 10 ug of siRNA was injected i.p. biweekly and 1 mg/kg of paclitaxel for SKOv3ip or 3 mg/kg for OVCAR5 or diluent were injected i.p. once a week. Body weight was assessed weekly and the body weight at the end of treatment was plotted. The columns indicate the mean  $\pm$  S.E..
